# Supplementary material
Source: ML conference proceedings conference paper supplement (https://openaccess.thecvf.com/content/WACV2024/html/De_Plaen_Contrastive_Learning_for_WACV_2024_paper.html)
Supplement: Supplementary file 1 [file De_Plaen_Contrastive_Learning_for_WACV_2024_supplemental.pdf]

# Contrastive Learning for Multi-Object Tracking with Transformers

## Supplementary Material

### A. Influence of the memory length

Tracking embeddings are kept in the memory for a given number of previous frames  $T$ , and they allow object re-identification without the need for learnable parameters to update tracks. The influence of the maximum memory length on the tracking metrics for BDD100K and MOT17 is displayed in Table 7 and Table 8. A history of one previous frame leads to low results on both datasets. The optimal memory length varies from around 9 previous frames on BDD100K to around 30 previous frames on MOT17. Since the parameter  $T$  only influences the association task, it has to be sufficiently high to recover IDs after occlusions or miss detections but not too high to avoid picking up an ID of an object that has left the scene. We state the difference between BDD100K and MOT17 mostly comes from the frame rates, which are respectively 5Hz and 30 Hz<sup>2</sup>. In seconds, the optimal memory durations are respectively 1.8s and 1s.

| length | mHOTA $\uparrow$ | mMOTA $\uparrow$ | mIDF1 $\uparrow$ | IDS $\downarrow$ |
|--------|------------------|------------------|------------------|------------------|
| 1      | 34.6             | 33.1             | 38.8             | 15404            |
| 5      | 38.0             | 35.1             | 45.1             | 6827             |
| 9      | <b>38.4</b>      | 35.3             | <b>45.8</b>      | 6186             |
| 12     | 38.3             | <b>35.4</b>      | 45.4             | <b>6092</b>      |
| 15     | 38.2             | <b>35.4</b>      | 45.2             | 6153             |

Table 7. Influence of the memory length on MOT metrics on BDD100K validation set.

| length | HOTA $\uparrow$ | MOTA $\uparrow$ | IDF1 $\uparrow$ | IDS $\downarrow$ |
|--------|-----------------|-----------------|-----------------|------------------|
| 1      | 57.0            | 72.2            | 63.6            | 1102             |
| 10     | 62.3            | <b>73.6</b>     | 73.7            | 368              |
| 20     | 63.0            | <b>73.6</b>     | 75.7            | 340              |
| 30     | <b>63.5</b>     | <b>73.6</b>     | <b>76.4</b>     | <b>331</b>       |
| 40     | 63.2            | <b>73.6</b>     | 76.2            | 343              |

Table 8. Influence of the memory length on MOT metrics on MOT17 validation set.

### B. Qualitative results

Figure 5 shows predictions from ContrasTR on the validation set of BDD100K. Since our method learns instance-level features by exploiting different views of the same object, it is robust in case of large camera movement (Figure

<sup>2</sup>On MOT17, videos 1-4 and 7-12 have a frame rate of 30 Hz, whereas videos 5-6 and 13-14 have a frame rate of respectively 14Hz and 25 Hz.

5a). It also performs well in case of (partial) object occlusion (Figure 5c). Furthermore, the method predicts discriminative tracking embeddings even under night conditions (Figure 5b) and in case of motion blur (Figure 5d). Nevertheless, the method sporadically swaps or re-assigns IDs from disappeared pedestrians in heavily crowded scenes (Figure 5e), or it assigns an ID from an occluded object to a newly appeared one. In Figure 5f, the car highlighted with a red circle (first frame) is occluded in the second frame, and its ID is assigned to a car further away. After the occlusion, the car further away kept its ID, and the first car got a new ID. Incorporating into the model trajectory and temporal information could be beneficial in mitigating these failure cases.

### C. Additional tracking embeddings visualization

Figure 6 shows a t-SNE projection (left) and the average cosine similarity (right) for the predicted tracking embeddings on three different videos from BDD100K. Tracking IDs are assigned with DETR’s bipartite matching. Therefore, every ground truth object will be assigned to the tracking embedding with minimum object detection matching cost. One can see that most tracking embeddings are clustered per ground-truth ID, even during night conditions (Figure 6a and Figure 6c).

### D. Hyper-parameters

We report the hyper-parameters used for the experiments on MOT17 and BDD100K in Table 9.

### E. Additional details on benchmarks results

**MOT17.** We report in Table 10 the results of our method obtained on the validation set. The validation set has been selected following [50] and the training setup follows the one presented in Section 4.1. We also include a detailed Table 11 that includes more sub-metrics and video-level performance on the test set of MOT17.

**BDD100K.** We also report detailed tables that include sub-metrics on the validation set and test set of BDD100K in Table 12 and in Table 13 respectively. The training setup follows the one presented in Section 4.1.

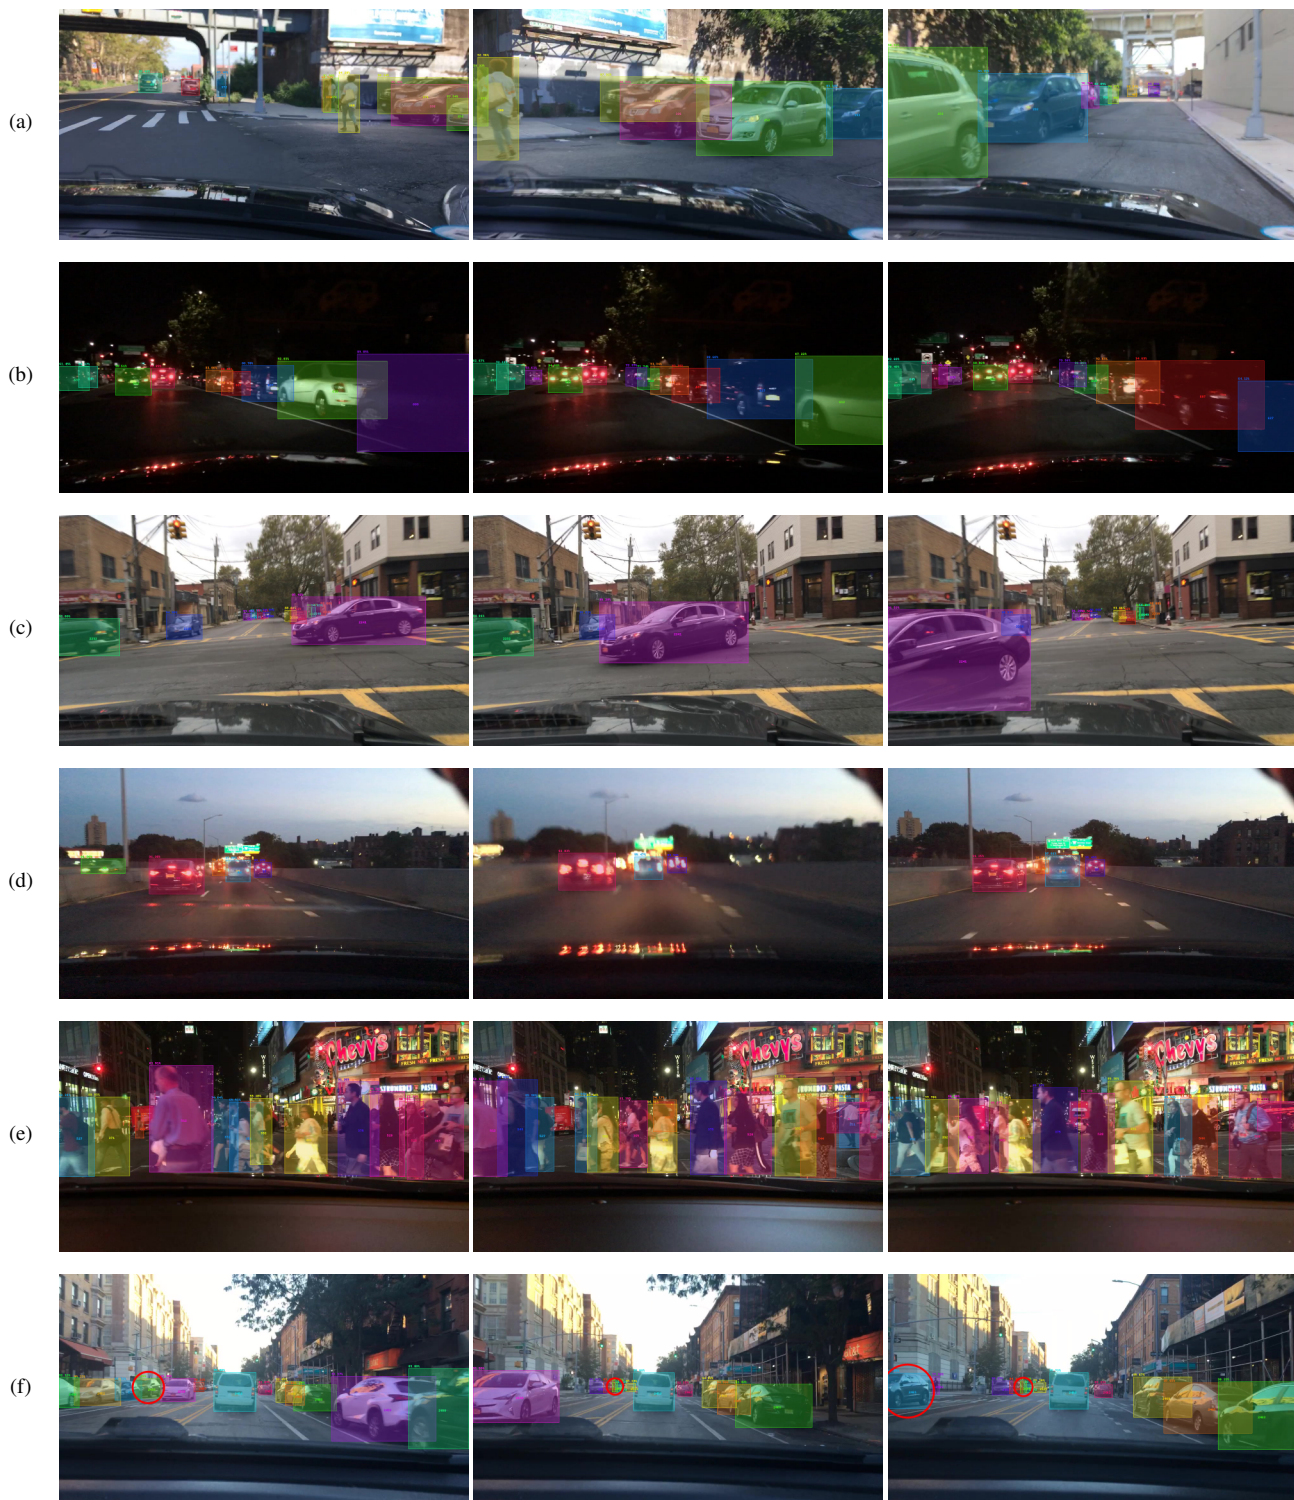

Figure 5. Predictions and failure cases of our model on the validation set of BDD100K.

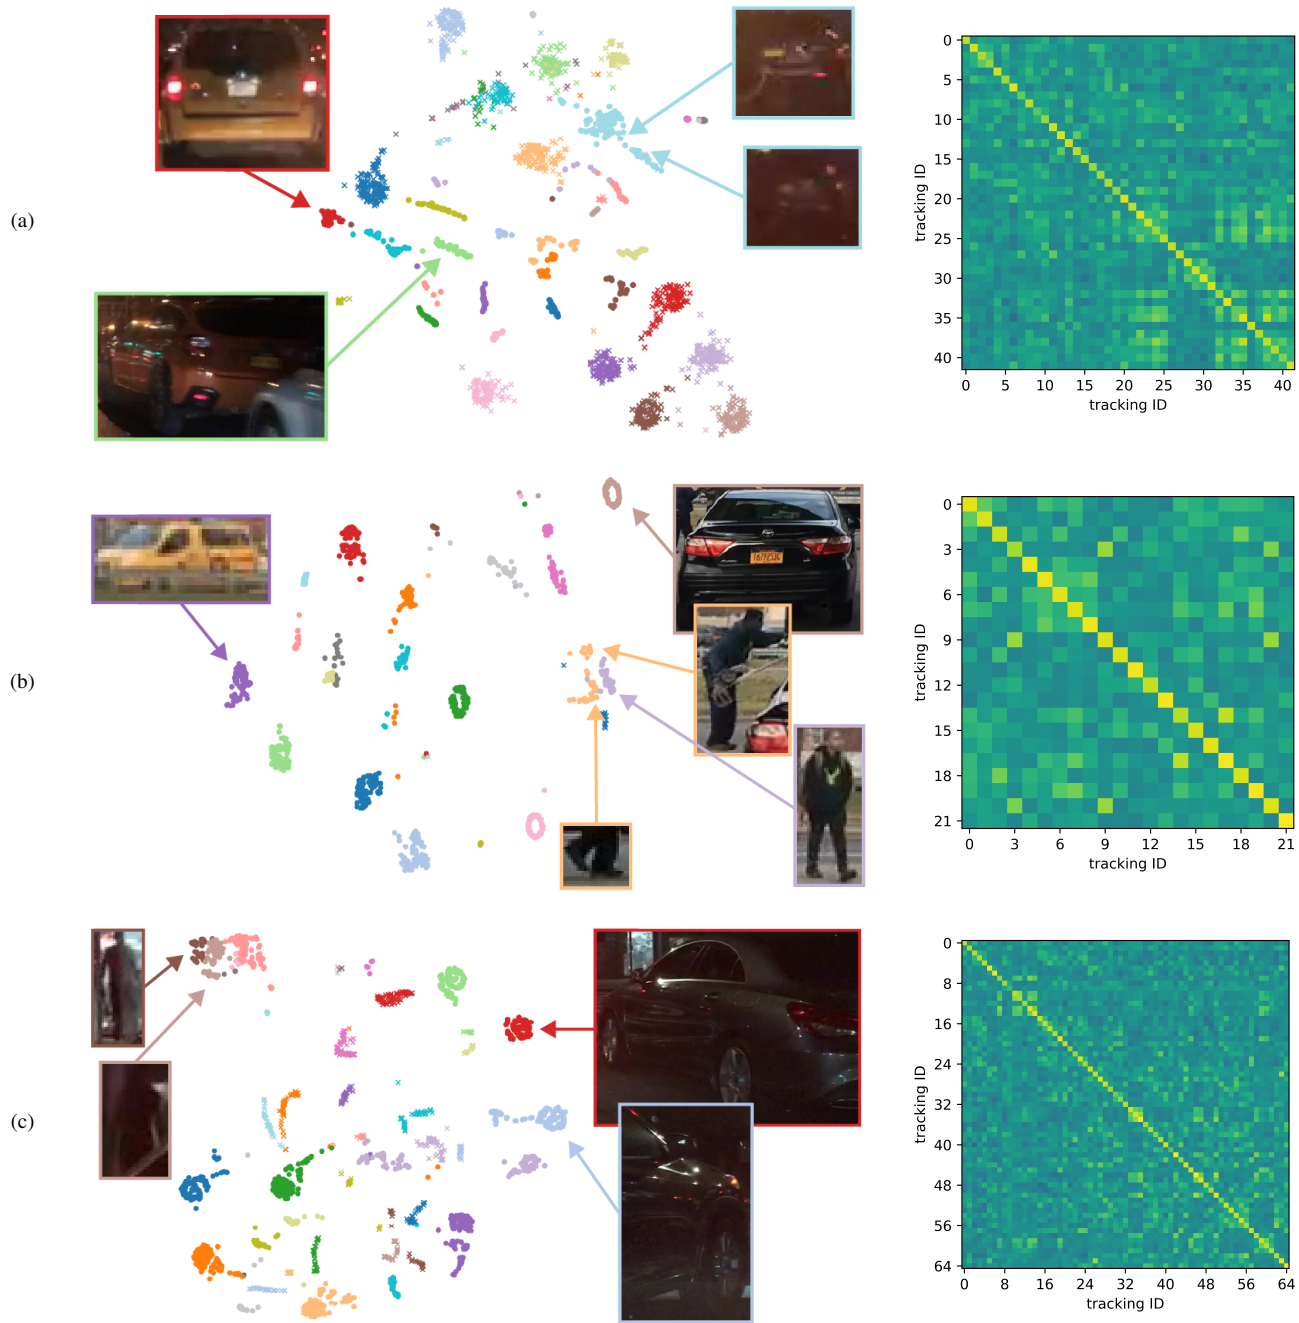

Figure 6. Visualization of predicted tracking embeddings on 3 different sequences from the BDD100K validation set. On the left, a t-SNE projection of the embeddings for the first 40 ground-truth objects, where each color-symbol pair represents a ground-truth tracking ID assigned with DETR’s bipartite matching. On the right, the average cosine similarity of predicted objects associated with the same ground-truth instance ID.

|                                                       | MOT17                                          | BDD100K           | BDD100K           |
|-------------------------------------------------------|------------------------------------------------|-------------------|-------------------|
| <i>model</i>                                          | Deformable-DETR with all refinements from DINO |                   |                   |
| <i>backbone</i>                                       | ResNet-50                                      | ResNet-50         | Swin-L            |
| <i>classification head</i>                            | linear layer                                   | linear layer      | linear layer      |
| <i>localization head</i>                              | 3 layers MLP                                   | 3 layers MLP      | 3 layers MLP      |
| <i>tracking head</i>                                  | 3 layers MLP                                   | 3 layers MLP      | 3 layers MLP      |
| <i>hidden dimension</i>                               | 256                                            | 256               | 256               |
| <i>dim feedforward (heads)</i>                        | 256                                            | 256               | 256               |
| <i>dim feedforward (transformer)</i>                  | 1024                                           | 1024              | 1024              |
| <i>num heads</i>                                      | 8                                              | 8                 | 8                 |
| <i>num queries</i>                                    | 300                                            | 300               | 300               |
| <i>weight decay</i>                                   | 0.05                                           | 0.05              | 0.05              |
| <i>dropout</i>                                        | 0                                              | 0                 | 0                 |
| <i>clip max norm</i>                                  | 0.1                                            | 0.1               | 0.1               |
| <i>cls loss coef</i>                                  | 2                                              | 2                 | 2                 |
| <i>bbox loss coef</i>                                 | 5                                              | 5                 | 5                 |
| <i>giou loss coef</i>                                 | 2                                              | 2                 | 2                 |
| <i>focal alpha</i>                                    | 0.25                                           | 0.25              | 0.25              |
| <i>contrastive loss temperature <math>\tau</math></i> | 0.1                                            | 0.1               | 0.1               |
| Pre-training                                          |                                                |                   |                   |
| <i>dataset</i>                                        | CrowdHuman                                     | BDD100k detection | BDD100k detection |
| <i>epochs</i>                                         | 50                                             | 36                | 36                |
| <i>LR drop (epoch)</i>                                | None                                           | None              | None              |
| <i>LR</i>                                             | $2 \cdot 10^{-4}$                              | $2 \cdot 10^{-4}$ | $2 \cdot 10^{-4}$ |
| <i>LR backbone</i>                                    | $2 \cdot 10^{-5}$                              | $2 \cdot 10^{-5}$ | $2 \cdot 10^{-5}$ |
| <i>LR linear proj mult</i>                            | 0.1                                            | 0.1               | 0.1               |
| <i>batch size</i>                                     | 16                                             | 48                | 24                |
| <i>contrastive loss coef</i>                          | 2                                              | 2                 | 2                 |
| Training                                              |                                                |                   |                   |
| <i>epochs</i>                                         | 15                                             | 10                | 10                |
| <i>LR drop (epoch)</i>                                | 10                                             | 8                 | 8                 |
| <i>LR</i>                                             | $2 \cdot 10^{-5}$                              | $2 \cdot 10^{-5}$ | $2 \cdot 10^{-5}$ |
| <i>LR backbone</i>                                    | $2 \cdot 10^{-6}$                              | $2 \cdot 10^{-6}$ | $2 \cdot 10^{-6}$ |
| <i>LR linear proj mult</i>                            | 0.1                                            | 0.1               | 0.1               |
| <i>batch size</i>                                     | 16                                             | 40                | 32                |
| <i>contrastive loss coef</i>                          | 2                                              | 1                 | 1                 |
| <i>num frames per video <math>N_f</math></i>          | 8                                              | 10                | 8                 |
| <i>objectness threshold</i>                           | 0.5                                            | 0.4               | 0.4               |
| <i>memory length <math>T</math></i>                   | 20                                             | 9                 | 9                 |
| <i>new instance id threshold</i>                      | 0.5                                            | 0.5               | 0.5               |

Table 9. Full set of hyper-parameters.

| Sequence | HOTA $\uparrow$ | MOTA $\uparrow$ | IDF1 $\uparrow$ | MT $\uparrow$ | ML $\downarrow$ | FP $\downarrow$ | FN $\downarrow$ | Rcll $\uparrow$ | Prcn $\uparrow$ | ID Sw. $\downarrow$ | Frag $\downarrow$ |
|----------|-----------------|-----------------|-----------------|---------------|-----------------|-----------------|-----------------|-----------------|-----------------|---------------------|-------------------|
| MOT17-02 | 45.0            | 50.1            | 54.6            | 12            | 12              | 413             | 4421            | 55.3            | 93.0            | 91                  | 254               |
| MOT17-04 | 73.3            | 85.5            | 87.8            | 47            | 3               | 755             | 2680            | 88.9            | 96.6            | 80                  | 368               |
| MOT17-05 | 48.3            | 72.3            | 59.3            | 37            | 9               | 147             | 741             | 78.0            | 94.7            | 41                  | 98                |
| MOT17-09 | 61.7            | 78.4            | 71.8            | 17            | 1               | 25              | 572             | 80.1            | 98.9            | 26                  | 40                |
| MOT17-10 | 57.7            | 70.8            | 74.4            | 15            | 2               | 188             | 1480            | 75.0            | 95.9            | 59                  | 240               |
| MOT17-11 | 62.9            | 67.1            | 72.6            | 21            | 9               | 492             | 984             | 78.2            | 87.8            | 12                  | 70                |
| MOT17-13 | 58.3            | 68.2            | 75.9            | 29            | 1               | 442             | 540             | 82.9            | 85.5            | 22                  | 108               |
| Overall  | 63.5            | 73.6            | 76.4            | 178           | 37              | 2462            | 11418           | 78.8            | 94.5            | 331                 | 1178              |

Table 10. Detailed results on MOT17 validation split.

| Sequence | HOTA↑ | MOTA↑ | IDF1↑ | MT↑ | ML↓ | FP↓   | FN↓    | Rcll↑ | Prcn↑ | ID Sw.↓ | Frag↓ |
|----------|-------|-------|-------|-----|-----|-------|--------|-------|-------|---------|-------|
| MOT17-01 | 50.3  | 53.9  | 62.0  | 8   | 8   | 329   | 2602   | 59.7  | 92.1  | 42      | 118   |
| MOT17-03 | 67.8  | 88.9  | 83.3  | 129 | 1   | 3420  | 7978   | 92.4  | 96.6  | 218     | 1354  |
| MOT17-06 | 47.6  | 61.7  | 58.7  | 79  | 60  | 734   | 3668   | 68.9  | 91.7  | 116     | 352   |
| MOT17-07 | 47.1  | 64.7  | 56.8  | 22  | 11  | 618   | 5214   | 69.1  | 95.0  | 123     | 419   |
| MOT17-08 | 39.1  | 48.3  | 42.9  | 21  | 17  | 288   | 10439  | 50.6  | 97.4  | 195     | 491   |
| MOT17-12 | 55.7  | 60.0  | 66.5  | 37  | 21  | 636   | 2781   | 67.9  | 90.2  | 52      | 198   |
| MOT17-14 | 40.0  | 46.0  | 53.0  | 19  | 48  | 809   | 9042   | 51.1  | 92.1  | 127     | 653   |
| Overall  | 58.9  | 73.7  | 71.8  | 945 | 498 | 20502 | 125172 | 77.8  | 95.5  | 2619    | 10755 |

Table 11. Detailed results on MOT17 test split.

|            | TETA↑ | HOTA↑ | MOTA↑ | MOTP↑ | IDF1↑ | FP↓   | FN↓    | IDSw↓ | MT↑  | PT↓  | ML↓  | FM↓   |
|------------|-------|-------|-------|-------|-------|-------|--------|-------|------|------|------|-------|
| pedestrian | 58.4  | 46.3  | 55.6  | -     | 56.0  | -     | -      | -     | -    | -    | -    | -     |
| rider      | 52.8  | 44.1  | 43.8  | -     | 59.8  | -     | -      | -     | -    | -    | -    | -     |
| car        | 74.4  | 64.0  | 72.3  | -     | 72.4  | -     | -      | -     | -    | -    | -    | -     |
| truck      | 62.3  | 51.3  | 44.3  | -     | 59.3  | -     | -      | -     | -    | -    | -    | -     |
| bus        | 66.9  | 58.9  | 50.6  | -     | 67.2  | -     | -      | -     | -    | -    | -    | -     |
| train      | 23.3  | 1.8   | 0.0   | -     | 2.5   | -     | -      | -     | -    | -    | -    | -     |
| motorcycle | 52.1  | 46.4  | 34.7  | -     | 58.1  | -     | -      | -     | -    | -    | -    | -     |
| bicycle    | 52.8  | 41.1  | 32.7  | -     | 47.9  | -     | -      | -     | -    | -    | -    | -     |
| Average    | 55.4  | 44.2  | 41.8  | 83.4  | 52.9  | 24580 | 113632 | 6360  | 8935 | 5862 | 3248 | 12707 |
| Overall    | 71.5  | 60.8  | 67.4  | 86.1  | 69.2  | 24580 | 113632 | 6360  | 8935 | 5862 | 3248 | 12707 |

Table 12. Detailed results with a Swin-L backbone on BDD100K validation split.

|            | TETA↑ | HOTA↑ | MOTA↑ | MOTP↑ | IDF1↑ | FP↓   | FN↓    | IDSw↓ | MT↑   | PT↓   | ML↓  | FM↓   |
|------------|-------|-------|-------|-------|-------|-------|--------|-------|-------|-------|------|-------|
| pedestrian | 58.5  | 46.7  | 55.4  | -     | 58.9  | -     | -      | -     | -     | -     | -    | -     |
| rider      | 54.6  | 46.2  | 45.3  | -     | 61.3  | -     | -      | -     | -     | -     | -    | -     |
| car        | 74.6  | 64.7  | 73.4  | -     | 73.8  | -     | -      | -     | -     | -     | -    | -     |
| truck      | 60.1  | 49.0  | 39.8  | -     | 58.1  | -     | -      | -     | -     | -     | -    | -     |
| bus        | 63.4  | 54.6  | 44.4  | -     | 61.4  | -     | -      | -     | -     | -     | -    | -     |
| train      | 29.2  | 21.7  | 7.2   | -     | 26.6  | -     | -      | -     | -     | -     | -    | -     |
| motorcycle | 52.2  | 42.8  | 38.4  | -     | 56.0  | -     | -      | -     | -     | -     | -    | -     |
| bicycle    | 52.9  | 43.0  | 38.7  | -     | 56.1  | -     | -      | -     | -     | -     | -    | -     |
| Average    | 55.7  | 46.1  | 42.8  | 80.6  | 56.5  | 48894 | 204063 | 10793 | 16917 | 10261 | 4953 | 22975 |
| Overall    | 71.4  | 61.1  | 67.7  | 85.7  | 70.5  | 48894 | 204063 | 10793 | 16917 | 10261 | 4953 | 22975 |

Table 13. Detailed results with a Swin-L backbone on BDD100K test split.
